# Supplementary material for: Scaffolding the cup-shaped double membrane in autophagy
Source: PLOS journal article supplement (doi:10.1371/journal.pcbi.1005817), 2017-10-24
Supplement: S10 (10.1371/journal.pcbi.1005817.s010) [file journal.pcbi.1005817.s010.pdf]

|                    |     |    |     |     |     |     |    |     |     |     |     |    |
|--------------------|-----|----|-----|-----|-----|-----|----|-----|-----|-----|-----|----|
| $K_A/(10^5 k_B T)$ | 0.6 | 1  | 1.4 | 1.8 | 2.2 | 2.6 | 3  | 3.4 | 3.8 | 4.2 | 4.6 | 5  |
| Success [%]        | 82  | 85 | 82  | 80  | 82  | 77  | 82 | 77  | 80  | 77  | 77  | 85 |
